# Supplementary material for: Preparing Collared Peccary (Pecari tajacu Linnaeus, 1758) for Reintroduction into the Wild: A Screening for Parasites and Hemopathogens of a Captive Population
Source: MDPI journal article supplement (doi:10.3390/pathogens13010047), 2024-01-03
Supplement: s1 [file s1]

**Table S1.** Sex of peccaries, body weight, parasites and hemopathogens, individually identified.

| Animal Identification | Sex | Body weight (kg) | Ectoparasite              | Hemopathogen                                                | Fecal sample                                                  |
|-----------------------|-----|------------------|---------------------------|-------------------------------------------------------------|---------------------------------------------------------------|
| 1                     | M   | 21               |                           | <i>Trypanosoma evansi</i>                                   | Strongylida, <i>Ascaris suum</i>                              |
| 2                     | M   | 18               |                           | <i>Leishmania braziliensis</i> , <i>Mycoplasma</i> sp.      | <i>Balantidium</i> sp.                                        |
| 3                     | F   | 17.3             |                           | <i>T. evansi</i>                                            | Strongylida                                                   |
| 4                     | M   | 16.1             |                           | <i>Mycoplasma</i> sp.                                       | <i>Balantidium</i> sp., Strongylida                           |
| 5                     | F   | 20               |                           | Not detected                                                | <i>Balantidium</i> sp., Strongylida                           |
| 6                     | F   | 11.9             |                           | <i>L. braziliensis</i> , <i>Mycoplasma</i> sp.              | <i>Balantidium</i> sp., Strongylida                           |
| 7                     | F   | 22.3             |                           | Not detected                                                | <i>Balantidium</i> sp., Strongylida                           |
| 8                     | F   | 8.7              |                           | <i>Mycoplasma</i> sp.                                       | <i>Balantidium</i> sp., Strongylida                           |
| 9                     | F   | 20.8             |                           | Not detected                                                | <i>Balantidium</i> sp., Strongylida                           |
| 10                    | F   | 17.2             |                           | <i>Mycoplasma</i> sp.                                       | <i>Balantidium</i> sp., Strongylida                           |
| 11                    | F   | 10.7             |                           | Not detected                                                | <i>Balantidium</i> sp., Strongylida, <i>Entamoeba polecki</i> |
| 12                    | M   | 20.2             | <i>Amblyomma sculptum</i> | <i>T. evansi</i> , Anaplasmataceae granulocyte hemobacteria | <i>Balantidium</i> sp.                                        |

|    |   |      |                                                                                                                |                                                                                                   |
|----|---|------|----------------------------------------------------------------------------------------------------------------|---------------------------------------------------------------------------------------------------|
|    | F | 26.3 | <i>T. evansi</i> , Anaplasmataceae granulocyte hemobacteria                                                    | <i>Balantidium</i> sp., Strongylida                                                               |
| 14 | F | 21.3 | <i>L. braziliensis</i>                                                                                         | <i>Balantidium</i> sp.                                                                            |
| 15 | F | 24.8 | <i>Mycoplasma</i> sp., Anaplasmataceae granulocyte hemobacteria                                                | <i>Balantidium</i> sp., <i>E. polecki</i>                                                         |
| 16 | M | 23.1 | <i>L. braziliensis</i> , <i>Mycoplasma</i> sp.                                                                 | <i>Balantidium</i> sp.                                                                            |
| 17 | F | 13.5 | not detected                                                                                                   | <i>Balantidium</i> sp., <i>E. polecki</i> , <i>Iodamoeba bütschlii</i> , Strongylida, Spiruridae, |
| 18 | F | 15   | not detected                                                                                                   | Strongylida                                                                                       |
| 19 | F | 23.2 | <i>Mycoplasma</i> sp.                                                                                          | <i>Balantidium</i> sp., <i>E. polecki</i> , <i>I. bütschlii</i>                                   |
| 20 | F | 24   | <i>L. braziliensis</i> ,<br><i>T. evansi</i> , <i>Mycoplasma</i> sp., Anaplasmataceae granulocyte hemobacteria | <i>Balantidium</i> sp.                                                                            |
| 21 | M | 22.5 | <i>Mycoplasma</i> sp.                                                                                          | <i>Balantidium</i> sp., Strongylida, Spiruridae                                                   |

|    |   |      |                    |                                                                      |                                     |
|----|---|------|--------------------|----------------------------------------------------------------------|-------------------------------------|
| 22 | F | 17.8 |                    | <i>L. braziliensis</i> ,<br><i>T. evansi</i> , <i>Mycoplasma</i> sp. | <i>Balantidium</i> sp., Strongylida |
| 23 | M | ND   |                    | <i>L. braziliensis</i> , <i>Mycoplasma</i> sp.                       | <i>Balantidium</i> sp., Strongylida |
| 24 | F | ND   | <i>A. sculptum</i> | <i>L. braziliensis</i> , <i>Mycoplasma</i> sp                        | <i>E. polecki</i>                   |

M= Male; F= Female.

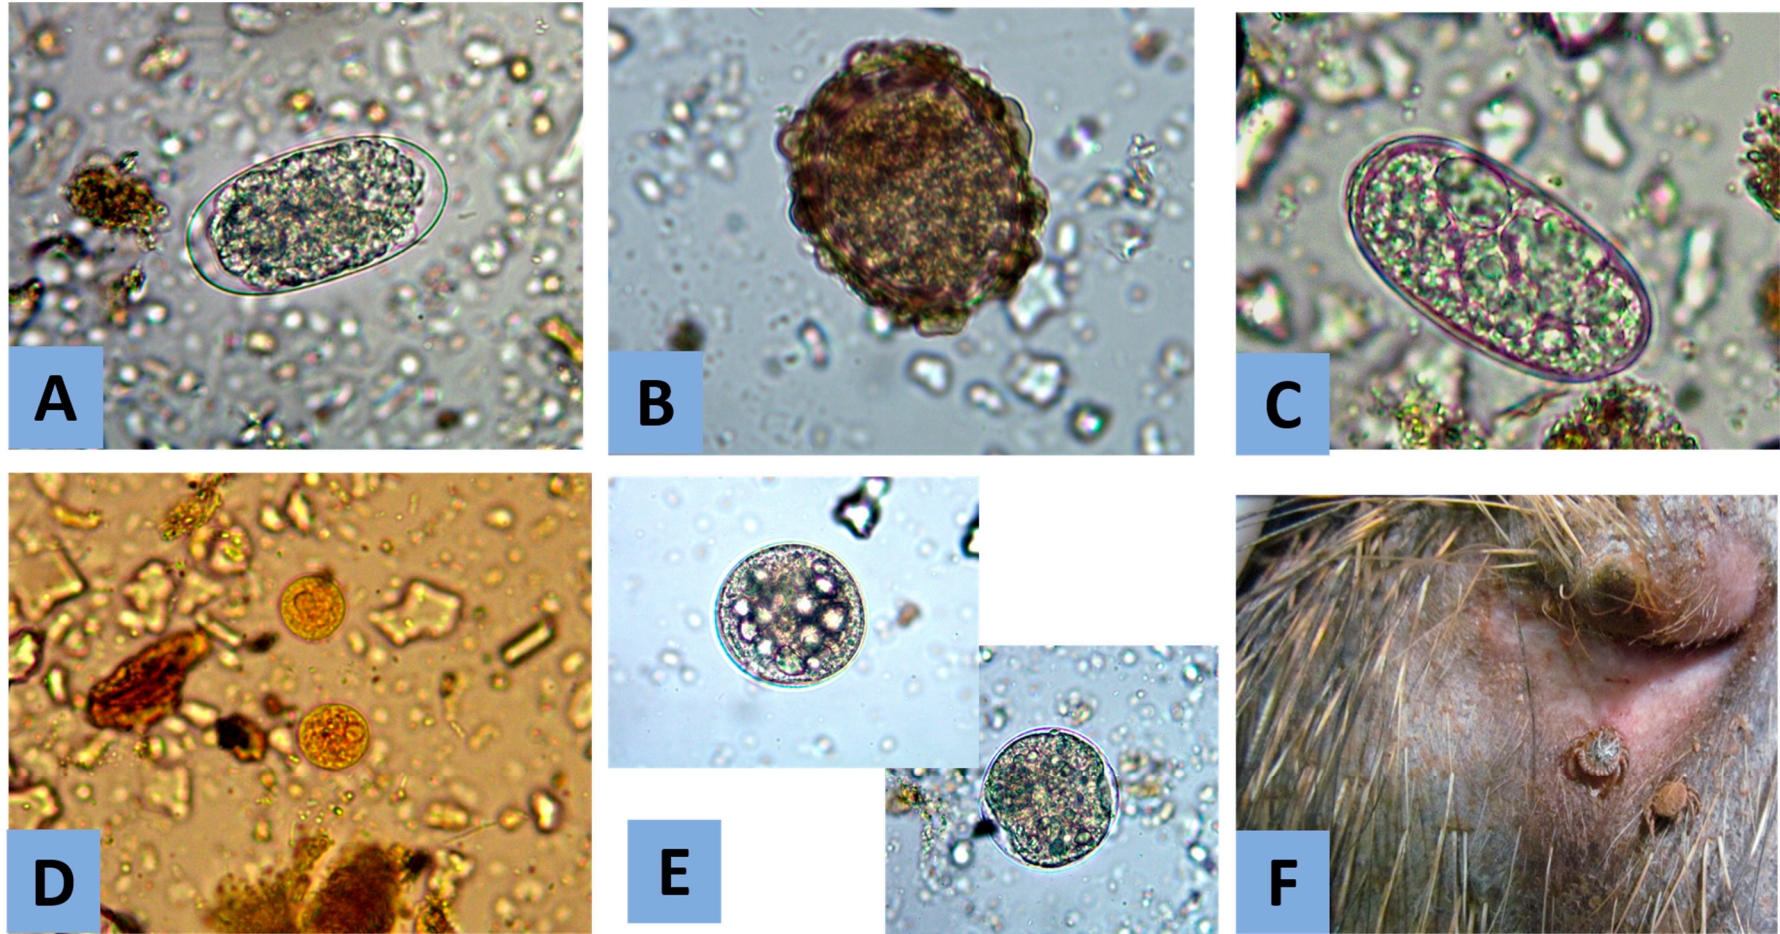

**Figure S1.** (A–E): Eggs and cysts found in fecal samples from peccary: A) Strongylida egg; B) *Ascaris* sp. eggs; C) Spiruridae egg; D) *Entamoeba polecki* cysts; E) *Balantidium* sp. cysts; F: Pair of *Amblyomma sculptum* attached below the tail of a collared peccary.
